# Supplementary material for: Copper-67-Labeled Bombesin Peptide for Targeted Radionuclide Therapy of Prostate Cancer
Source: MDPI journal article supplement (doi:10.3390/ph15060728), 2022-06-08
Supplement: s1 [file s1]

## **Copper-67 Labeled Bombesin Peptide for Targeted Radiotherapy of Prostate Cancer**

**Truc T. Huynh, Ellen M. van Dam, Sreeja Sreekumar, Cedric Mpoy, Benjamin J. Blyth, Fenella Muntz, Matthew J. Harris, and Buck E. Rogers**

| <b>TABLE OF CONTENTS</b>                                                                                                                                  | <b>Page</b> |
|-----------------------------------------------------------------------------------------------------------------------------------------------------------|-------------|
| Figure S1: HPLC chromatograms showing the [ <sup>67</sup> Cu]Cu-SAR-BBN                                                                                   | 2           |
| Figure S2: Radio-TLC chromatograms of [ <sup>67</sup> Cu]Cu-SAR-BBN in 50mM DTPA                                                                          | 3           |
| Figure S3: Stability assays of [ <sup>67</sup> Cu]Cu-SAR-BBN                                                                                              | 4           |
| Figure S4: Body weight changes of PC-3 tumor-bearing mice injected with either saline (as control) or [ <sup>67</sup> Cu]Cu-SAR-BBN (n = 12, bars SEM)    | 5           |
| Figure S5: Hematoxylin-Eosin (H&E) staining of kidneys, livers, and pancreas tissue slices with (A) Saline (as control) (B) [ <sup>67</sup> Cu]Cu-SAR-BBN | 6           |
| Figure S6: Proliferation heatmap of (A) Tumor #48C, Control (B) Tumor #41, [ <sup>67</sup> Cu]Cu-SAR-BBN                                                  | 7           |
| Table S1: Biodistribution report of [ <sup>67</sup> Cu]Cu-SAR-BBN in C57BL/6 female mice                                                                  | 8           |

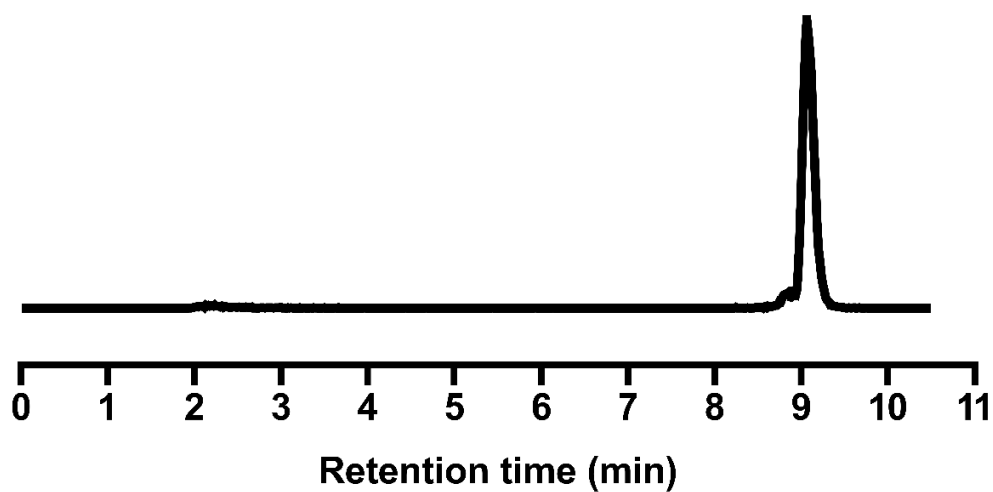

**Figure S1: HPLC chromatograms showing the [ $^{67}\text{Cu}$ ]Cu-SAR-BBN.** Radio-HPLC analysis was performed with a mobile phase of water (0.1% TFA) and acetonitrile (0.1% TFA), 5–90% acetonitrile in 10:30 min, and elution was run with a 1 mL/min flow rate.

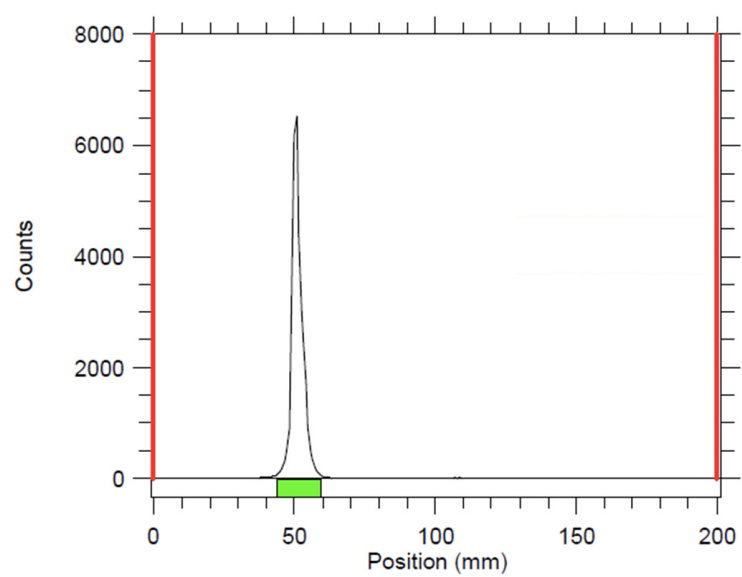

**Figure S2: Radio-TLC chromatograms of  $[^{67}\text{Cu}]\text{Cu-SAR-BBN}$  in 50mM DTPA .**

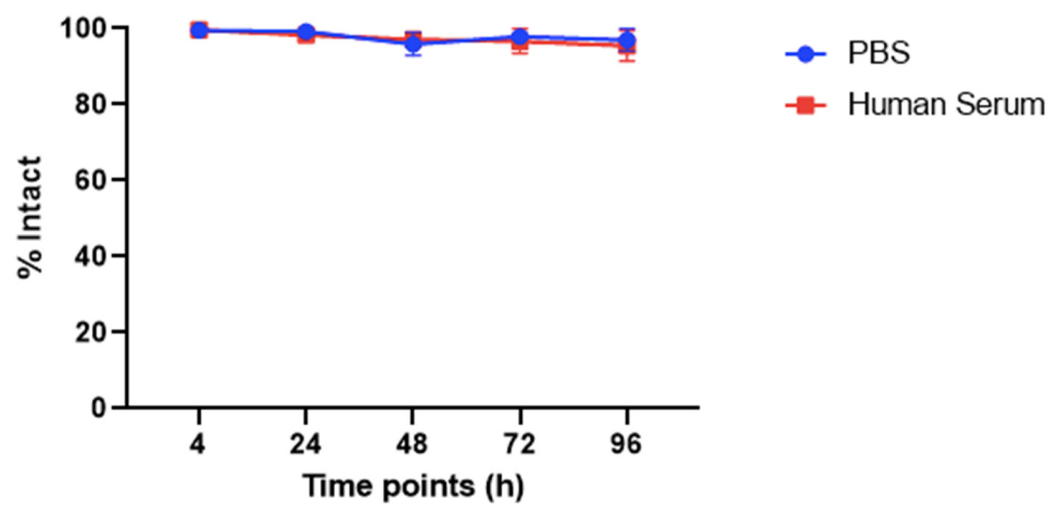

Figure S3: Stability assays of  $[^{67}\text{Cu}]\text{Cu-SAR-BBN}$ .

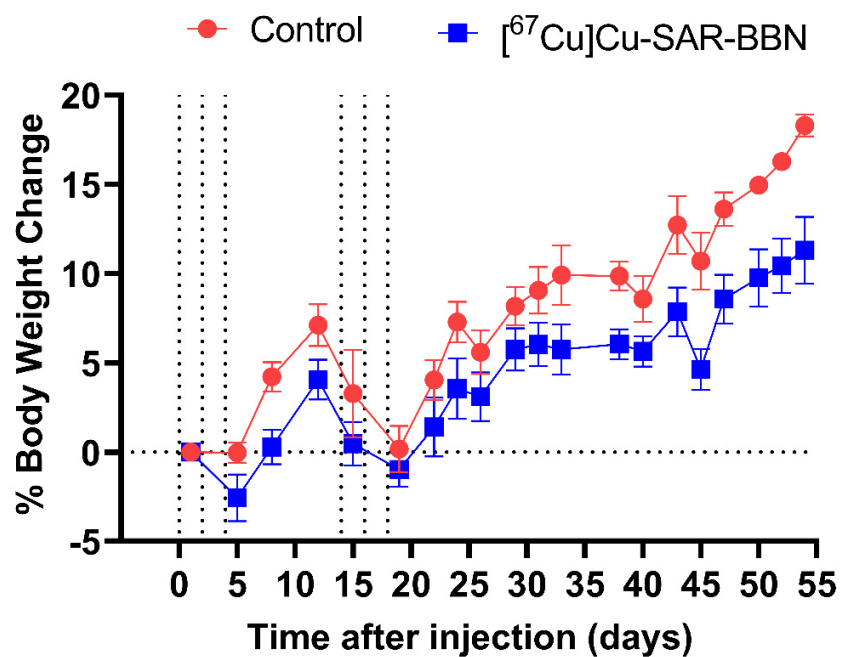

**Figure S4: Body weight changes of PC-3 tumor-bearing mice injected with either saline (as control) or [67Cu]Cu-SAR-BBN (n = 12, bars SEM). The doses were given on days indicated by dotted lines via tail vein. The data represents the mean percent weight change from baseline (day 1) for each group.**

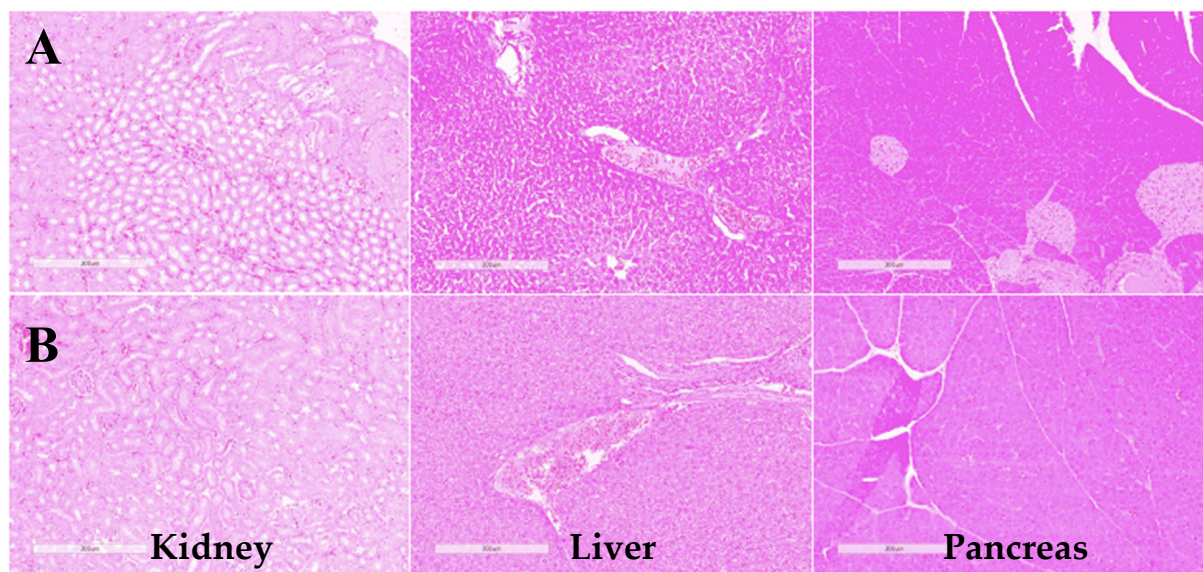

**Figure S5: Hematoxylin-Eosin (H&E) staining of kidneys, livers, and pancreas tissue slices with (A) Saline (as control) (B) [ $^{67}\text{Cu}$ ]Cu-SAR-BBN.**

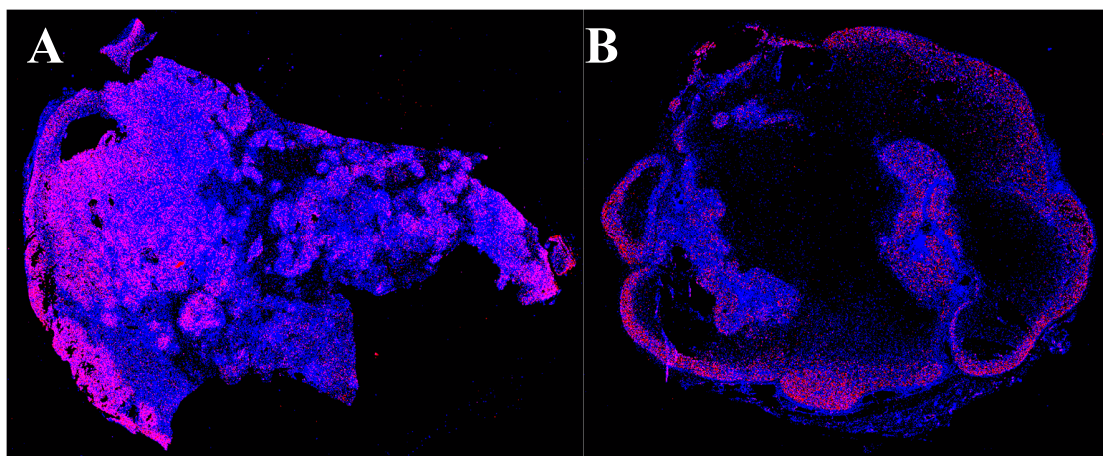

**Figure S6: Proliferation heatmap of (A) Tumor #48C, Control (B) Tumor #41,  $[^{67}\text{Cu}]\text{Cu-SAR-BBN}$ .** Control group tumors contain limited areas of poor cellularity/necrosis (black zones), large areas of tumor with moderate proliferation (sparse red/blue signal) and high proliferation areas at the periphery (intense red signal).  $[^{67}\text{Cu}]\text{Cu-SAR-BBN}$  treated tumors contain extensive areas of necrosis (black zones), limited areas of surviving tumor with limited proliferation (sparse red/blue signal) and high proliferation areas at the periphery (intense red signal).

**Table S1: Biodistribution report of [<sup>67</sup>Cu]Cu-SAR-BBN in C57BL/6 female mice.**

|                 | 1 h   |       | 2 h   |      | 4 h    |      | 6 h    |      |
|-----------------|-------|-------|-------|------|--------|------|--------|------|
|                 | %ID/g | SD    | %ID/g | SD   | %ID/g  | SD   | %ID/g  | SD   |
| <b>Blood</b>    | 1.06  | 0.18  | 0.62  | 0.19 | 0.53   | 0.17 | 0.54   | 0.13 |
| <b>Lung</b>     | 2.75  | 0.28  | 1.95  | 0.68 | 2.68   | 0.81 | 3.25   | 0.72 |
| <b>Liver</b>    | 7.21  | 1.05  | 5.08  | 1.31 | 5.90   | 1.25 | 6.78   | 1.31 |
| <b>Spleen</b>   | 1.94  | 0.72  | 1.27  | 0.37 | 0.94   | 0.15 | 0.90   | 0.12 |
| <b>Kidney</b>   | 6.15  | 0.73  | 3.99  | 0.95 | 3.48   | 0.75 | 3.53   | 0.68 |
| <b>Muscle</b>   | 0.52  | 0.17  | 0.25  | 0.10 | 0.35   | 0.07 | 0.59   | 0.63 |
| <b>Bone</b>     | 0.88  | 0.14  | 0.40  | 0.12 | 0.47   | 0.12 | 0.46   | 0.14 |
| <b>Heart</b>    | 1.00  | 0.10  | 0.58  | 0.21 | 0.78   | 0.28 | 0.84   | 0.22 |
| <b>Pancreas</b> | 22.32 | 10.54 | 14.71 | 5.43 | 5.48   | 0.73 | 3.38   | 0.80 |
|                 | 24 h  |       | 72 h  |      | 6 days |      | 9 days |      |
|                 | %ID/g | SD    | %ID/g | SD   | %ID/g  | SD   | %ID/g  | SD   |
| <b>Blood</b>    | 0.33  | 0.16  | 0.39  | 0.04 | 0.11   | 0.03 | 0.06   | 0.03 |
| <b>Lung</b>     | 1.81  | 0.72  | 1.89  | 0.17 | 0.68   | 0.16 | 0.32   | 0.12 |
| <b>Liver</b>    | 3.80  | 1.36  | 4.03  | 0.28 | 1.31   | 0.28 | 0.59   | 0.24 |
| <b>Spleen</b>   | 0.51  | 0.20  | 0.74  | 0.08 | 0.30   | 0.07 | 0.14   | 0.05 |
| <b>Kidney</b>   | 2.37  | 0.80  | 3.10  | 0.10 | 1.37   | 0.34 | 0.74   | 0.20 |
| <b>Muscle</b>   | 0.20  | 0.11  | 0.27  | 0.04 | 0.21   | 0.07 | 0.15   | 0.04 |
| <b>Bone</b>     | 0.31  | 0.22  | 0.25  | 0.16 | 0.09   | 0.03 | 0.09   | 0.03 |
| <b>Heart</b>    | 0.84  | 0.42  | 1.35  | 0.29 | 0.93   | 0.28 | 0.58   | 0.20 |
| <b>Pancreas</b> | 0.55  | 0.27  | 0.75  | 0.11 | 0.39   | 0.09 | 0.22   | 0.06 |
